# Supplementary material for: Two azido-bridged copper(ii) coordination polymers with isonicotinate-N-oxide and picolinate-N-oxide acting as co-ligands
Source: Royal Society of Chemistry journal article supplement (doi:10.1039/c0ce00914h), 2011-01-01
Supplement: c0ce00914h.pdf [file c0ce00914h.pdf]

**Supporting Information**

**Two azido-bridged copper(II) coordination polymers with  
isonicotinate-N-oxide and picolinate-N-oxide acting as  
co-ligands**

Qian Gao,<sup>a</sup> Ya-Bo Xie,<sup>\*a</sup> Melissa Thorstad,<sup>b</sup> Ji-Hong Sun,<sup>\*a</sup> Yue Cui,<sup>a</sup> and Hong-Cai Zhou<sup>\*b</sup>

College of Environmental and Energy Engineering, Beijing University of Technology, Beijing,  
100124, P. R. China. Fax:+86-10-67391983. E-mail: xieyabo@bjut.edu.cn; jhsun@bjut.edu.cn

Department of Chemistry, Texas A&M University, PO Box30012, College Station, TX, 77842,  
USA. E-mail: zhou@mail.chem.tamu.edu

<sup>a</sup>Beijing University of Technology

<sup>b</sup>Texas A&M University

XRPD results of **1** and **2** are shown below. The slight differences between simulation spectrum and measurement data indicate the minor impure happened to these two compounds.

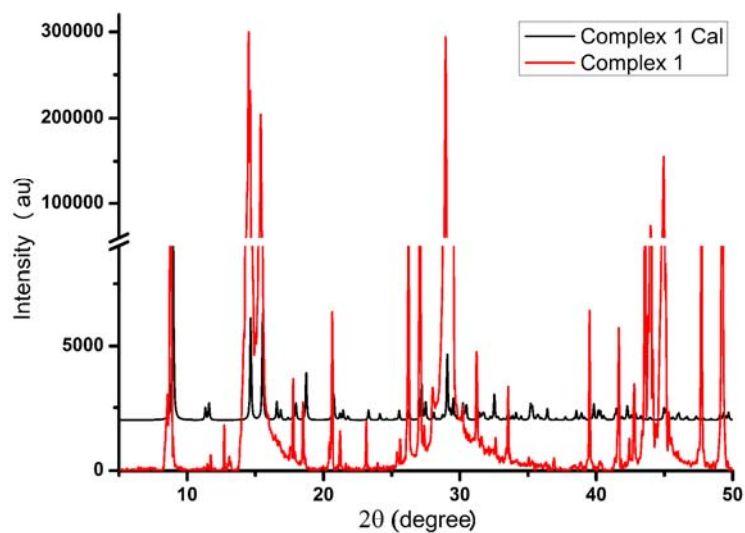

ESI-figure 1 The XRPD result of **1**.

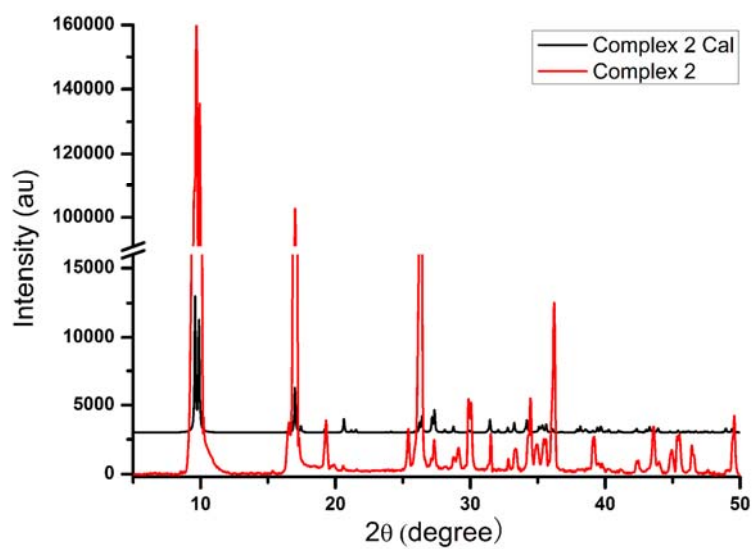

ESI-figure 2 The XRPD result of **2**.
